# Supplementary material
Source: HighWire-hosted journal article supplement (https://jnm.snmjournals.org/highwire/filestream/94219/field_highwire_adjunct_files/0/jnm078889_Supplemental_Figure_1.pdf)
Supplement: jnm078889_Supplemental_Figure_1.pdf [file jnm078889_Supplemental_Figure_1.pdf]

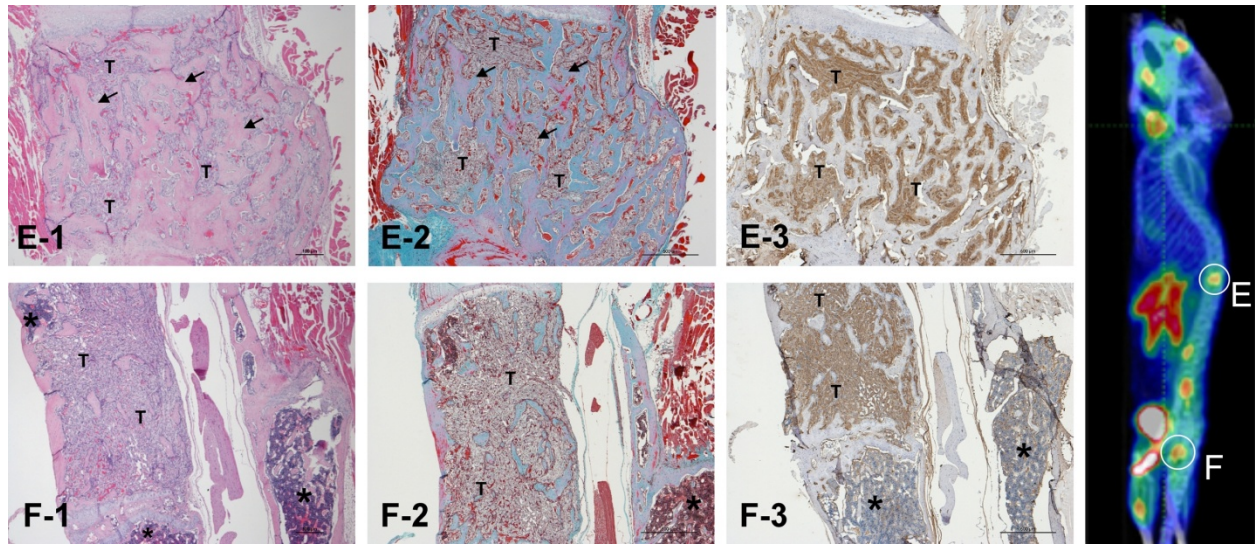

Supplemental Figure 1. In E, lysis of normal bone occurred simultaneously with the formation of osteoid (eosinophilic, arrow, E-1, H&E), which stained blue green with MGT (arrow, E-2). The tumor cells showed a dark brown cytoplasmic immunopositive stain for pan-cytokeratin (E-3). In F, the tumor cells replace the haematopoietic cells with lysis of normal bone (F-1, H&E; F-2). The tumor cells were positive for pan-cytokeratin (F-3). In some areas in F, normal hematopoietic tissue is still present (\*).
